# Supplementary material for: Mycobacterium smegmatis HtrA Blocks the Toxic Activity of a Putative Cell Wall Amidase
Source: PubMed Central journal article supplement — Cell Rep. Author manuscript; Available in PMC 2019 May 28. (PMC6538288; doi:10.1016/j.celrep.2018.12.063), 2019-05-21
Supplement: NIHMS1530009-supplement-1.pdf [file NIHMS1530009-supplement-1.pdf]

Cell Reports, Volume 27

**Supplemental Information**

***Mycobacterium smegmatis* HtrA Blocks  
the Toxic Activity of a Putative Cell Wall Amidase**

**Katherine J. Wu, Cara C. Boutte, Thomas R. Ioerger, and Eric J. Rubin**

SUPPLEMENTAL FIGURES

Figure S1

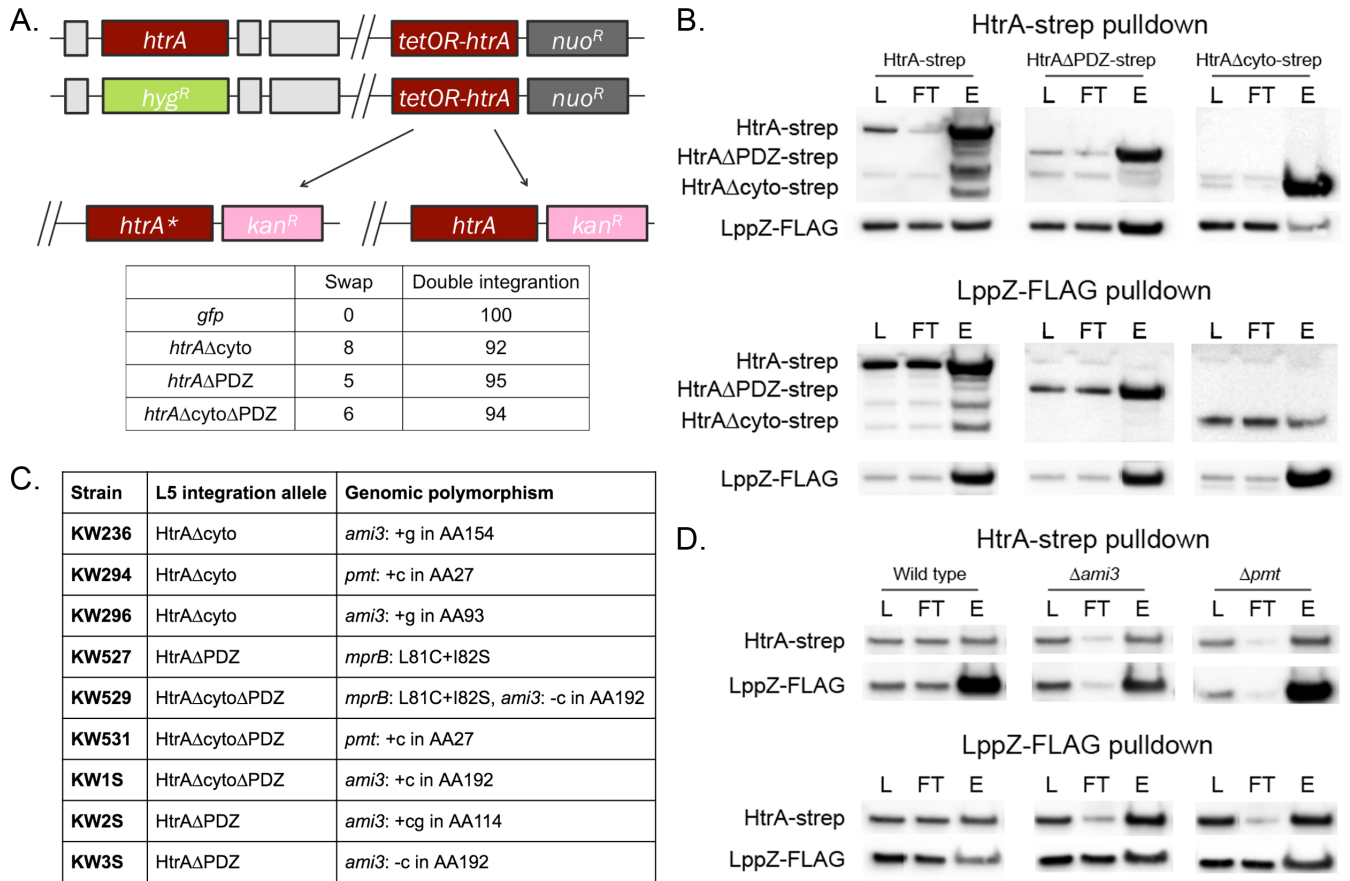

**Figure S1, related to Figure 2: HtrA suppressor screen and HtrA-LppZ interactions. A. The cytoplasmic and PDZ domains of HtrA are essential for viability.** Top: a schematic of the L5 essentiality swap. Placing a second copy of *htrA*, along with a nourseothricin resistance cassette, at the L5 phage integration site allows replacement of endogenous *htrA* with a hygromycin resistance cassette. The L5-integrated copy of *htrA* can be swapped for another copy of *htrA* attached to another antibiotic resistance marker, but not for truncations of *htrA* missing the cytoplasmic and/or PDZ domains (*htrA*\*). Bottom: quantification of *htrA* swaps. A total of 100 transformants were tested for antibiotic resistance. **B. HtrA and LppZ still interact even when the PDZ or cytoplasmic domains of HtrA are removed.** Different alleles of HtrA-Strep and LppZ-FLAG were individually immunoprecipitated using anti-Strep and anti-FLAG magnetic beads, respectively, and the following fractions were analyzed by Western blot: L = lysate, FT = flow through, E = elution. **C. Successful HtrA truncation swaps were whole genome sequenced for extragenic suppressors.** All strains sequenced carried mutations in *ami3*, *pmt*, and/or *mprB*. **D. HtrA and LppZ interact even in the absence of Ami3 or Pmt.** In the indicated genetic backgrounds, HtrA-Strep and LppZ-FLAG were individually immunoprecipitated using anti-Strep and anti-FLAG magnetic beads, respectively, and the

following fractions were analyzed by Western blot: L = lysate, FT = flow through, E = elution. Western blot images were cropped, but display all relevant lanes and reactive bands.

Figure S2

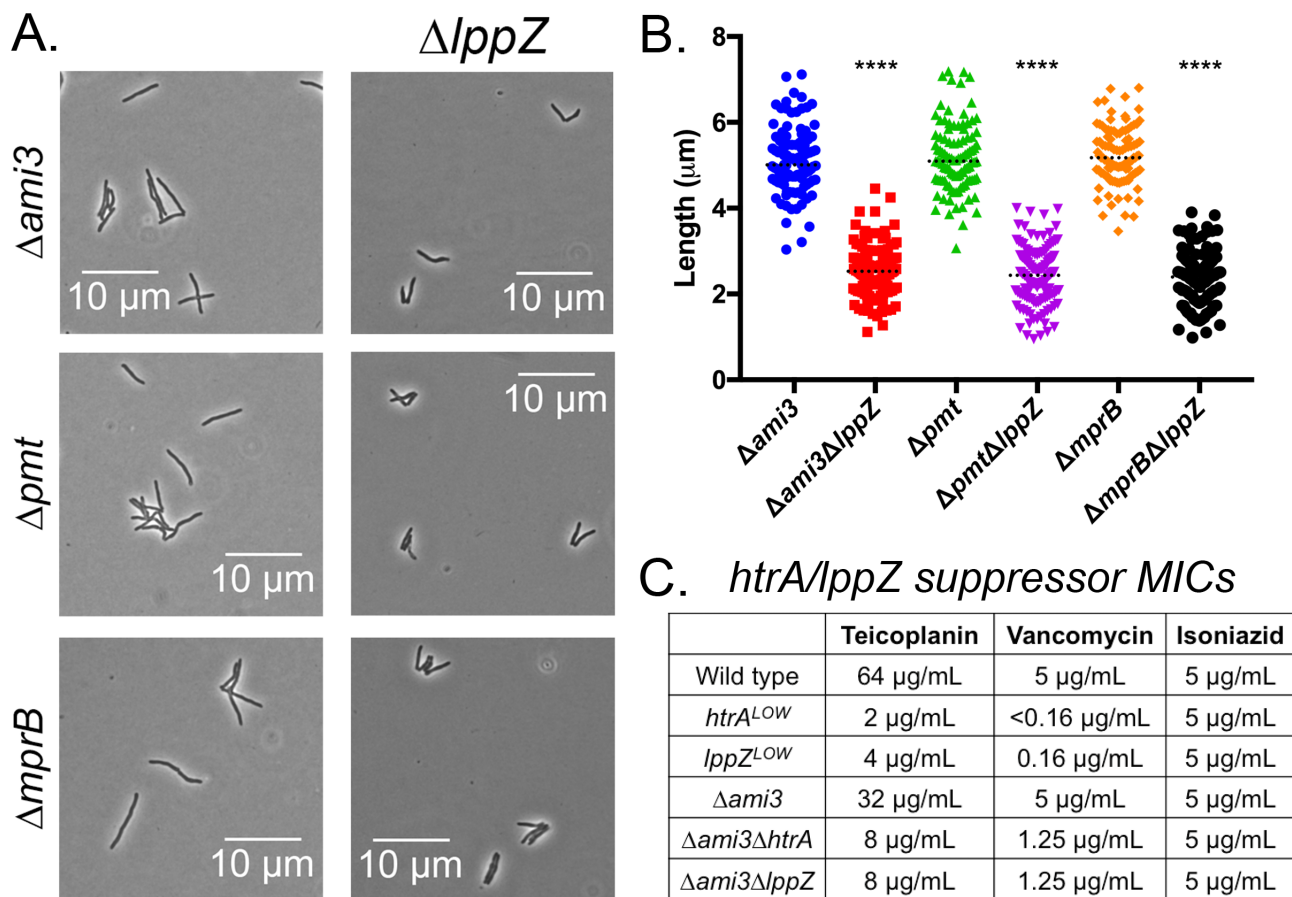

**Figure S2, related to Figure 2: Suppressors of *htrA* essentiality also suppress *lppZ* essentiality and produce morphologically similar cells. A and B. Morphology of *lppZ* suppressor strains.** Single suppressor knockouts and *lppZ* double knockouts were grown to log phase and analyzed for total cell length. At least 100 cells were quantified in each condition. Dotted black lines indicate median values. \*\*\*\* = p-value <0.0001. **C. Loss of *htrA* or *lppZ* in a suppressor background partially rescues antibiotic susceptibility.** The indicated strains were grown in teicoplanin, vancomycin, and isoniazid.

Figure S3

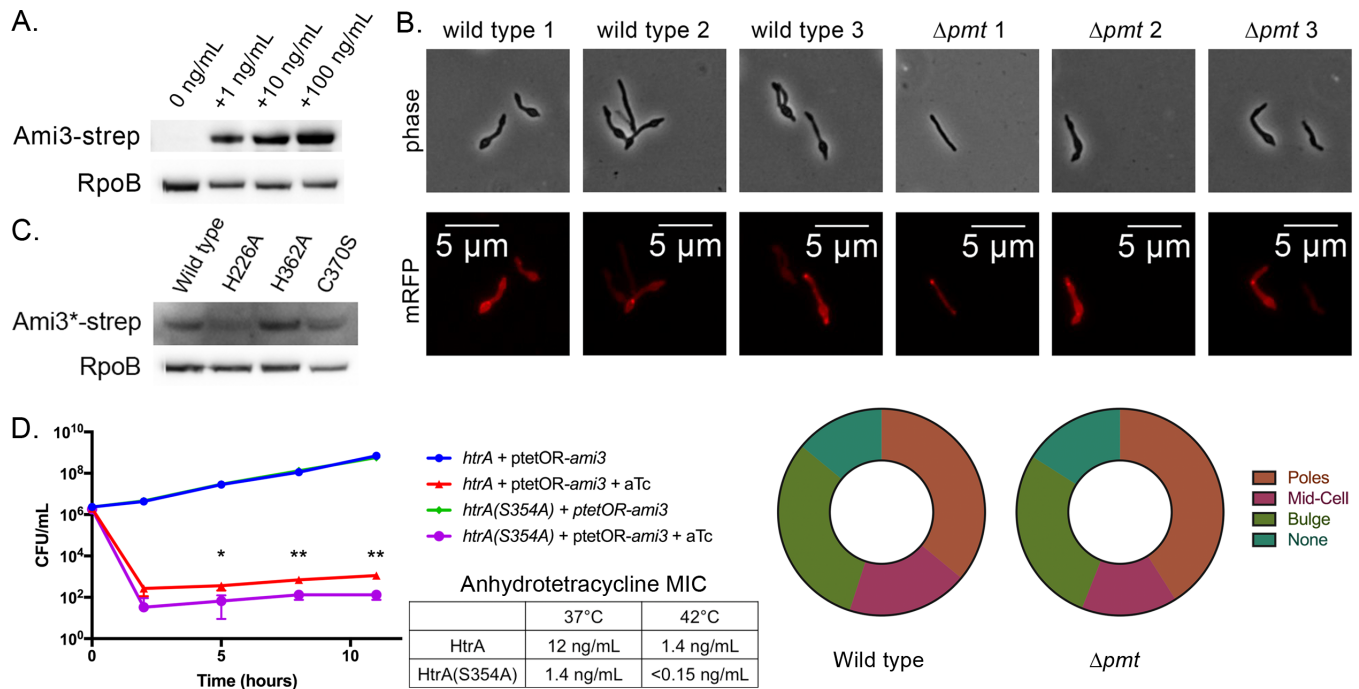

**Figure S3, related to Figure 3 and Figure 4: Variable toxicity of Ami3. A. Different amounts of aTc induce different amounts of Ami3.** A strain carrying an aTc-inducible copy of *ami3* was grown in the indicated concentrations of aTc for two hours. Cell lysate was analyzed by Western blotting using anti-Strep and anti-RpoB as a loading control. **B. Ami3-mRFP localization.** Ami3-mRFP was expressed under an aTc-inducible promoter on an episomal vector in either wild-type or  $\Delta pmt$  cells. Strains were analyzed by microscopy after 2 hours of induction with 100 ng/mL aTc. The localization of Ami3-mRFP to the poles, mid-cell, or bulges was quantified for both strains. In some cases, cells did not exhibit clear Ami3-mRFP localization; these were marked as “None.” 100 cells were counted in each strain. **C. Catalytic mutants of Ami3 accumulate to varying degrees.** Whole cell lysate of the indicated strains was analyzed by Western blotting using anti-Strep and anti-RpoB as a loading control. Ami3\* indicates the respective Ami3 allele. **D. Killing dynamics of Ami3 overexpression in different HtrA genetic backgrounds.** Left: Strains expressing either wild-type *htrA* or *htrA(S354A)* and *ami3* under an aTc-inducible episomal construct were grown in the presence or absence of 100 ng/mL aTc. Aliquots were taken at the indicated time points for CFU analysis. \* $p < 0.05$ , \*\* $p < 0.01$ . Error bars represent standard deviation of the mean. Right: the aTc MIC of strains expressing either wild-type *htrA* or *htrA(S354A)* and *ami3* under an aTc-inducible episomal construct was measured at two different temperatures. Western blot images were cropped, but display all relevant lanes and reactive bands.

Figure S4

A.

| Background   | Total Peptides | Unique Peptides |
|--------------|----------------|-----------------|
| Wild type    | 1400           | 62              |
| $\Delta pmt$ | 1524           | 60              |

| Residue | XCorr | $\Delta$ Corr | # Ions | Peptide                     | Max      | PPM   |
|---------|-------|---------------|--------|-----------------------------|----------|-------|
| T122    | 1.284 | 0.314         | 15/84  | R.T#NTVQIAITRPENAAPTAPAPK.N | 2.01E+05 | 0.44  |
| T130    | 2.324 | 0.018         | 25/84  | R.TNTVQIAIT#RPENAAPTAPAPK.N | 1.73E+07 | -0.4  |
| T138    | 2.139 | 0.265         | 23/84  | R.TNTVQIAITRPENAAPT#APAPK.N | 1.73E+07 | -0.57 |
| T138    | 3.164 | 0.406         | 27/84  | R.TNTVQIAITRPENAAPT#APAPK.N | 1.73E+07 | -0.41 |

B.

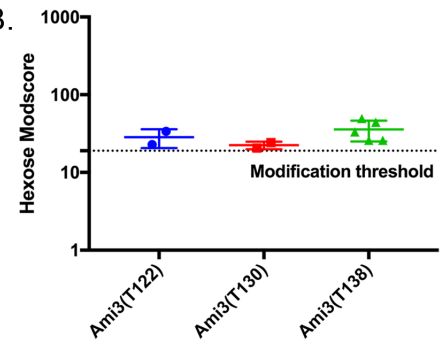

C.

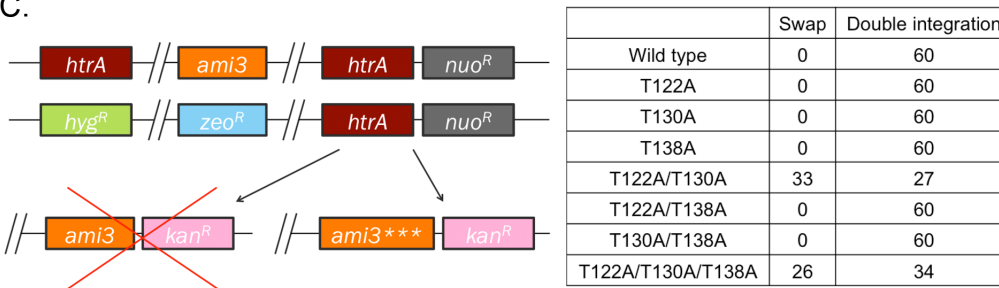

D.

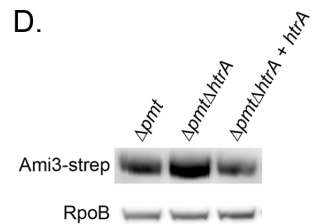

**Figure S4, related to Figure 5: Ami3 is mannosylated.** **A. Hexose modified peptides of Ami3.** Ami3-Strep was immunoprecipitated from wild-type and  $\Delta pmt$  backgrounds and analyzed by mass spectrometry for hexose modifications. Total peptides and unique peptides from each strain's samples are listed. Only the wild-type sample yielded modifications, which are scored below. **B. Hexose modification scores of Ami3.** Scores over 19 signify a confident assignment of modification. **C. Toxicity of Ami3 mannosylation mutants.** Top: the endogenous copies of *ami3* and *htrA* were replaced with zeocin and hygromycin resistance cassettes, respectively, and a copy of *htrA* was integrated at the L5 site. *ami3* or mannosylation mutant alleles of *ami3* (*ami3\*\*\**) were transformed into this background. Full swaps that acquire kanamycin resistance at the expense of noursesthracin resistance render strains devoid of *htrA* and must thus carry a suppressor mutation. Bottom: quantification of *ami3* and *ami3\*\*\** swaps. A total of 60 transformants were tested for antibiotic resistance. **C. Ami3 stability is still dependent on HtrA in the absence of Pmt.** Whole cell lysate of the indicated strains was analyzed by Western blotting using anti-Strep and anti-RpoB as a loading control. Western blot images were cropped, but display all relevant lanes and reactive bands.

Figure S5

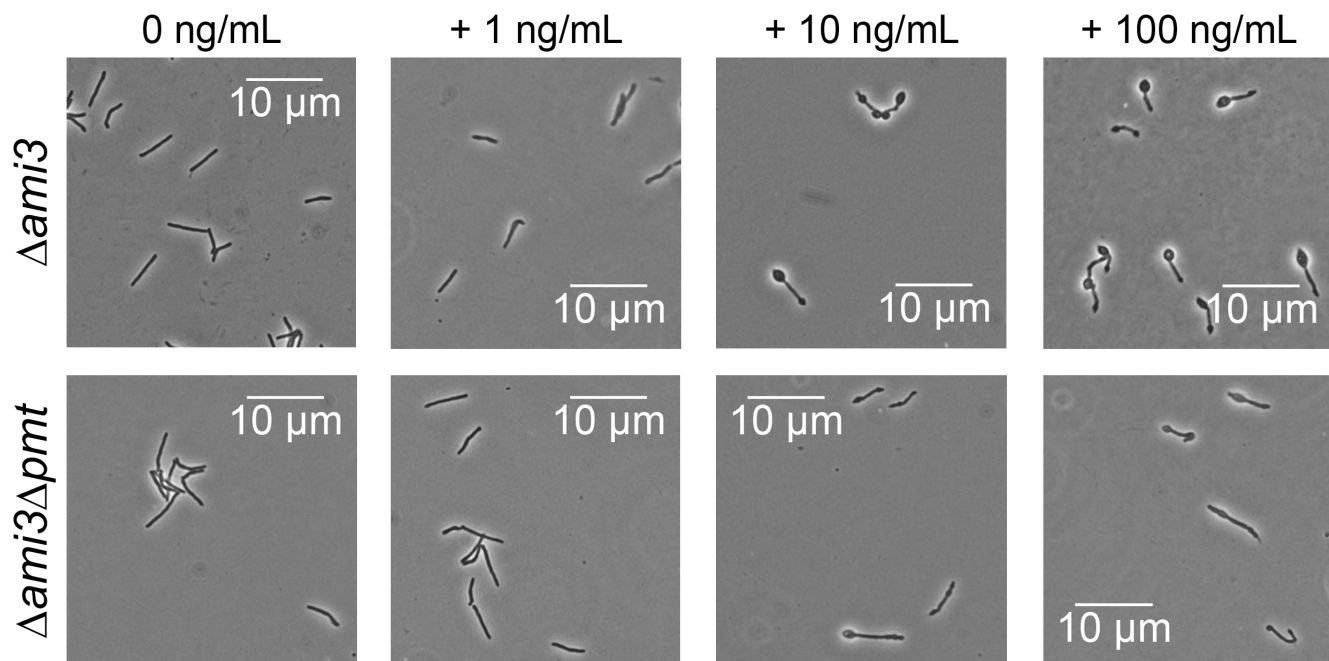

**Figure S5, related to Figure 6: Loss of *pmt* relieves morphological defects in *Ami3* overexpressions in a dose-dependent manner.** Strains expressing *ami3* in a wild-type or  $\Delta pmt$  background under an aTc-inducible promoter were grown in the indicated concentrations of aTc.

Figure S6

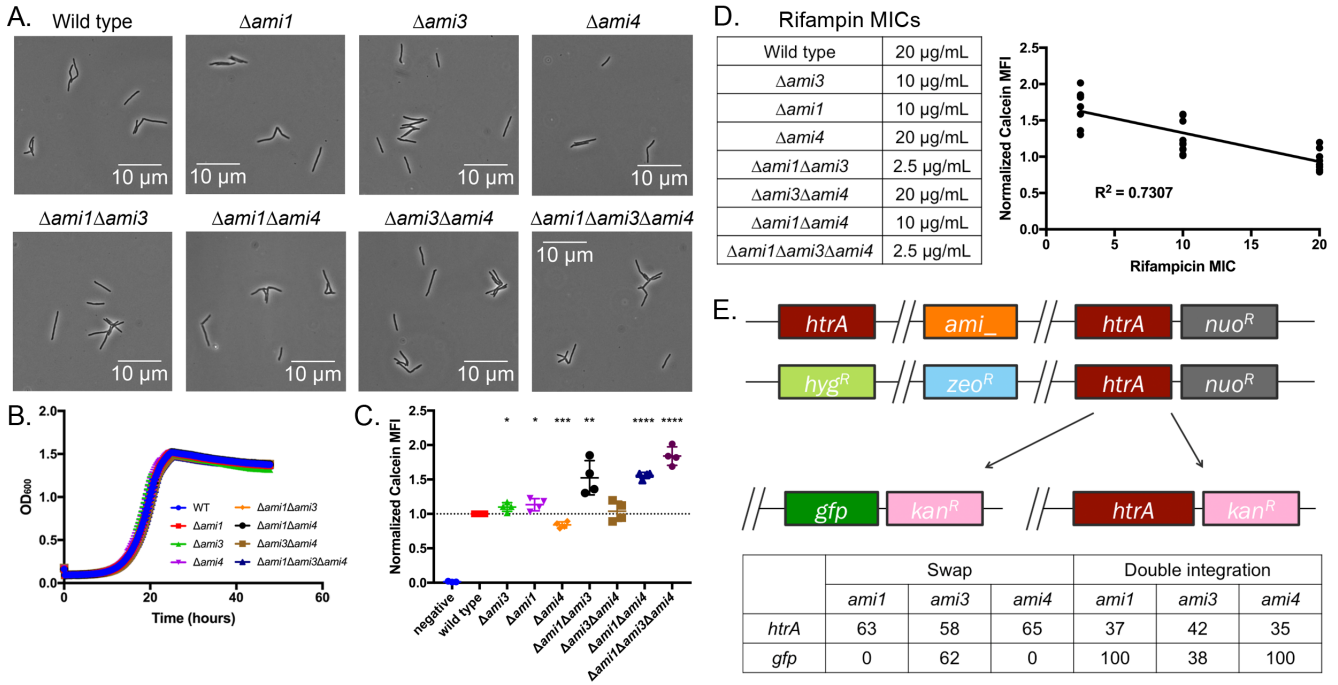

**Figure S6, related to Figure 2: Ami1, Ami3, and Ami4 contribute to cell wall impermeability. A and B. Single and combinatorial knockouts of *ami1*, *ami3*, and *ami4* grow normally.** The indicated strains were grown to log phase and observed by microscopy, or grown at 37°C. Error bars represent standard deviation of the mean. **C and D. Combinatorial amidase knockouts exhibit increased permeability to calcein and rifampin.** The indicated strains were grown in the presence of calcein or rifampin; calcein permeability and rifampin MIC are negatively correlated. Calcein mean fluorescence intensity (MFI) was measured by flow cytometry and normalized to wild type. \* $p < 0.05$ , \*\* $p < 0.01$ , \*\*\* $p < 0.001$ , \*\*\*\* $p < 0.0001$ . Error bars represent standard deviation of the mean. **E. Knocking out *ami3*, but not *ami1* or *ami4*, suppresses *htrA* essentiality.** Top: the endogenous copies of the indicated amidase allele and *htrA* were replaced with zeocin and hygromycin resistance cassettes, respectively, and a copy of *htrA* was integrated at the L5 site. *htrA* or *gfp* were transformed into this background. Full swaps that acquire kanamycin resistance at the expense of noursethricin resistance render strains devoid of *htrA* and must thus carry a suppressor mutation. Bottom: quantification of amidase suppressor swaps. A total of 100 transformants were tested for antibiotic resistance.
